# Supplementary material
Source: PubMed Central journal article supplement (PMC6713580)
Supplement: NIHMS1534153-supplement-5.pdf [file NIHMS1534153-supplement-5.pdf]

Supplementary Table 4

| ID                 | Genes in dataset |
|--------------------|------------------|
| ENSMUSG00000067931 | Zfp948           |
| ENSMUSG00000044786 | ZFP36            |
| ENSMUSG00000034640 | TIPARP           |
| ENSMUSG00000049516 | SPTY2D1          |
| ENSMUSG00000024042 | Sik1             |
| ENSMUSG00000019970 | SGK1             |
| ENSMUSG00000025283 | SAT1             |
| ENSMUSG00000040511 | Pvr              |
| ENSMUSG00000031538 | PLAT             |
| ENSMUSG00000035828 | PIM3             |
| ENSMUSG00000020893 | PER1             |
| ENSMUSG00000049612 | OMG              |
| ENSMUSG00000028341 | NR4A3            |
| ENSMUSG00000023034 | NR4A1            |
| ENSMUSG00000045903 | NPAS4            |
| ENSMUSG00000025402 | NAB2             |
| ENSMUSG00000020190 | MKNK2            |
| ENSMUSG00000035621 | MIDN             |
| ENSMUSG00000038612 | MCL1             |
| ENSMUSG00000053907 | MAT2A            |
| ENSMUSG00000026822 | LCN2             |
| ENSMUSG00000052837 | JUNB             |
| ENSMUSG00000052684 | JUN              |
| ENSMUSG00000026864 | HSPA5            |
| ENSMUSG00000007617 | HOMER1           |
| ENSMUSG00000031770 | HERPUD1          |
| ENSMUSG00000028214 | GEM              |
| ENSMUSG00000003545 | FOSB             |
| ENSMUSG00000021250 | FOS              |
| ENSMUSG00000032265 | FAM46A           |
| ENSMUSG00000028967 | ERRFI1           |
| ENSMUSG00000071341 | EGR4             |
| ENSMUSG00000037868 | EGR2             |
| ENSMUSG00000038418 | EGR1             |
| ENSMUSG00000018648 | DUSP14           |
| ENSMUSG00000024190 | DUSP1            |
| ENSMUSG00000007682 | DIO2             |

#### Supplementary Table 4

|                    |         |
|--------------------|---------|
| ENSMUSG00000028195 | CYR61   |
| ENSMUSG00000001467 | CYP51A1 |
| ENSMUSG00000029380 | CXCL2   |
| ENSMUSG00000032515 | CSRNP1  |
| ENSMUSG00000063889 | CREM    |
| ENSMUSG00000050370 | CH25H   |
| ENSMUSG00000023067 | CDKN1A  |
| ENSMUSG00000020423 | BTG2    |
| ENSMUSG00000026628 | ATF3    |
| ENSMUSG00000022602 | ARC     |
| ENSMUSG00000090698 | APOLD1  |

**Supplementary Table 4. IPA associations of CREB and pink module genes.**

IPA-annotated associations between CREB and genes within the pink module used to designate CREB as an upstream regulator.

Supplementary Table 5

| sequence                | score | mismatches       | region     | locus                         |
|-------------------------|-------|------------------|------------|-------------------------------|
| GTGTCTCTAGTAGCAAGAAGGAG | 1.3   | 3MMs [8:9:10]    | Intronic   | chr13:58,017,033-58,017,052   |
| TTCTCTTGGATAGCAAGAAGAGG | 0.9   | 4MMs [1:3:7:10]  | Exonic     | chr10:120,862,516-120,862,538 |
| GAGGCTAGGCTAGCAAGAAGCAG | 0.9   | 4MMs [2:4:7:10]  | Intronic   | chr17:66,912,485-66,912,507   |
| TGGTCTCATTAGCAAGAAGGAG  | 0.9   | 4MMs [1:2:8:9]   | Intronic   | chr1:54,726,324-54,726,346    |
| TTGTTTCAGTGAGCAAGAAGAAG | 0.8   | 4MMs [1:5:8:11]  | Intronic   | chr8:106,647,508-106,647,530  |
| GAGACTCGGGCAGCAAGAAGCAG | 0.7   | 4MMs [2:4:10:11] | Exonic     | chr11:4,620,726-4,620,748     |
| ATGTATCTGTTGGCAAGAAGGGG | 0.7   | 4MMs [1:5:8:12]  | Intergenic | chr10:98,263,028-98,263,047   |
| GTGTCTAGGCTAGCAATAAGAAG | 0.7   | 3MMs [7:10:17]   | Intronic   | chrX:59,487,863-59,487,885    |
| GTGTCTCATTAGCAAAAAGCGG  | 0.6   | 3MMs [8:9:17]    | Intronic   | chr6:39,880,798-39,880,817    |
| TTGTATCTGTTACCAAGAAGGAG | 0.6   | 4MMs [1:5:8:13]  | Intergenic | chr7:76,226,866-76,226,888    |
| GTCTATTGCTTAGCAAGAAGCAG | 0.6   | 4MMs [3:5:7:9]   | Intergenic | chr3:141,217,776-141,217,795  |
| GTGTATATTTAGCAAGAAGAAG  | 0.6   | 4MMs [5:7:8:9]   | Intergenic | chr3:-140880732               |
| TTGTCTGTGTGAGCAAGAAGTGG | 0.6   | 4MMs [1:7:8:11]  | Intronic   | chr15:60,923,593-60,923,615   |
| CTGACTAGGTGAGCAAGAAGAGG | 0.6   | 4MMs [1:4:7:11]  | Intronic   | chr9:77,780,867-77,780,889    |
| ATGTCTTTGTCAGCAAGAAGTGG | 0.6   | 4MMs [1:7:8:11]  | Intergenic | chr17:78,503,795-78,503,814   |
| GCTTCCGGGTTAGCAAGAAGGGG | 0.5   | 4MMs [2:3:6:7]   | Intergenic | chrX:140,519,228-140,519,247  |
| GTTTTGTGGTTAGCAAGAAGTGG | 0.5   | 4MMs [3:5:6:7]   | Intergenic | chr15:46,795,651-46,795,670   |
| GATTCTAGGTCAGCAAGAAGTGG | 0.5   | 4MMs [2:3:7:11]  | Intergenic | chr7:115,388,496-115,388,518  |
| GTTCCTGGGTGAGCAAGAAGGGG | 0.5   | 4MMs [3:4:7:11]  | Intergenic | chr1:156,308,549-156,308,568  |
| GGGTCTTGAAAGCAAGAAGCAG  | 0.5   | 4MMs [2:7:10:11] | Intronic   | chr10:119,120,732-119,120,754 |
| GTGTAACCTTTAGCAAGAAGTAG | 0.5   | 4MMs [5:6:8:9]   | Exonic     | chrX:46,329,695-46,329,717    |
| GGCTCTCGATCAGCAAGAAGAAG | 0.5   | 4MMs [2:3:9:11]  | Intronic   | chr10:39,308,257-39,308,279   |
| GAGTCTCAGATAGCAAGATGGAG | 0.5   | 4MMs [2:8:10:19] | Intronic   | chr5:124,012,822-124,012,842  |
| GTTTCACTGTGAGCAAGAAGGGG | 0.5   | 4MMs [3:6:8:11]  | Intronic   | chr3:138,425,682-138,425,701  |
| GTGTGTCCATCAGCAAGAAGGGG | 0.5   | 4MMs [5:8:9:11]  | Intronic   | chr15:6,381,046-6,381,068     |
| GTGACTCAGGTAGCAAGAGGGGG | 0.5   | 4MMs [4:8:10:19] | Intronic   | chr2:27,686,048-27,686,067    |
| GTGTTACTGTGAGCAAGAAGAAG | 0.5   | 4MMs [5:6:8:11]  | Intronic   | chr15:54,416,659-54,416,681   |
| CTGTCTTGGCTTGCAAGAAGAGG | 0.5   | 4MMs [1:7:10:12] | Intergenic | chrX:134,612,978-134,612,997  |
| ATGTCTCAATTAGCAAGAATTAG | 0.4   | 4MMs [1:8:9:20]  | Intergenic | chr16:74,573,254-74,573,273   |
| CTGTGGCGGTTAGCAAGAATTGG | 0.4   | 4MMs [1:5:6:20]  | Intergenic | chr13:57,310,961-57,310,980   |
| AAGTCTCAGTTAGCCAGAAGAGG | 0.4   | 4MMs [1:2:8:15]  | Intronic   | chr5:129,000,768-129,000,787  |
| GGGACTCTGTTAGCTAGAAGGAG | 0.4   | 4MMs [2:4:8:15]  | Intergenic | chr17:14,766,129-14,766,151   |
| GAGTCTCGGGTAGGAAGAAGTGG | 0.4   | 3MMs [2:10:14]   | Intronic   | chr4:104,584,561-104,584,583  |

Supplementary Table 5

|                         |     |                  |            |                               |
|-------------------------|-----|------------------|------------|-------------------------------|
| TTGTCTCAGTGAGCAAGAACAAG | 0.4 | 4MMs [1:8:11:20] | Intergenic | chr9:104,001,895-104,001,917  |
| GCGTCTGGGATACCAAGAAGGAG | 0.4 | 4MMs [2:7:10:13] | Intronic   | chr1:74,035,356-74,035,378    |
| CTGTCTCTGTTGGCAAGAATAGG | 0.3 | 4MMs [1:8:12:20] | Intergenic | chr1:122,025,746-122,025,765  |
| GTGACCAGTTTAGCAAGAAGTAG | 0.3 | 4MMs [4:6:7:9]   | Intronic   | chr2:37,847,382-37,847,401    |
| GATTCTCGGTTTGCAAGAAAAG  | 0.3 | 4MMs [2:3:12:20] | Intergenic | chr6:138,762,486-138,762,508  |
| CTGACTCCGTTAGCAAGCAGAGG | 0.3 | 4MMs [1:4:8:18]  | Intergenic | chr8:10,706,481-10,706,503    |
| ATGACTCAGTTAGCAAGCAGGAG | 0.3 | 4MMs [1:4:8:18]  | Intergenic | chr7:13,526,174-13,526,196    |
| TTGTCTGGCTTAGCAAGAATAGG | 0.3 | 4MMs [1:7:9:20]  | Intronic   | chr13:66,959,308-66,959,327   |
| CTGTCTCTGATAGCAAGCAGAAG | 0.3 | 4MMs [1:8:10:18] | Intronic   | chr5:148,115,931-148,115,950  |
| CTGTCCAGGTTAGCAAGAAAAG  | 0.3 | 4MMs [1:6:7:20]  | Intergenic | chr17:52,061,997-52,062,016   |
| GTTTCTTGATTTGCAAGAAGTGG | 0.3 | 4MMs [3:7:9:12]  | Intergenic | chr5:18,717,619-18,717,641    |
| GTGTCTGGCACAGCAAGAAGTGG | 0.3 | 4MMs [7:9:10:11] | Intronic   | chr2:64,072,392-64,072,411    |
| GAGTCTCGTTTAGGAAGAAGCAG | 0.3 | 3MMs [2:9:14]    | Intronic   | chr11:119,674,065-119,674,087 |
| GAGTCTCTGTTAGCAACAAAGGG | 0.3 | 4MMs [2:8:17:20] | Intergenic | chr19:55,008,407-55,008,429   |
| GTGTCTTACTTAGCAAGAATGAG | 0.3 | 4MMs [7:8:9:20]  | Intronic   | chr1:51,068,885-51,068,907    |
| TTGTGTCGGTTTGCAAGAGGGGG | 0.3 | 4MMs [1:5:12:19] | Intronic   | chr18:21,959,602-21,959,624   |

Supplementary Table 5. *Zfp189*-targeting sgRNA predicted binding sites throughout *Mus musculus* genome.

Except for at the targeted *Zfp189* locus, there are no high-affinity binding sites for our *Zfp189*-targeting sgRNA across the entire mouse genome. Of the 141 predicted off-targets, the top sites with “scores”>0.3 are represented here. “Score” ranges from 0-100 and denotes the predicted on-target faithfulness of our synthesized sgRNA acting at the mismatched locus. The closest “matches” exhibit >3 mismatched nucleotides.

Supplementary Table 6

| sequence                | score | mismatches        | region     | locus                         |
|-------------------------|-------|-------------------|------------|-------------------------------|
| GCCAGGTCTTTGGCTCCGCTGAG | 0.4   | 4MMs [3:8:11:20]  | Exonic     | chr11:36,051,900-36,051,922   |
| GCGAAACATTCGGCTCCGCCAG  | 0.3   | 4MMs [5:6:7:20]   | Exonic     | chr1:34,169,207-34,169,226    |
| GCGGGGTACTGGGCTCCGCATGG | 0.2   | 4MMs [4:9:11:20]  | Intergenic | chr11:117,647,952-117,647,974 |
| GCGAGGTTATAGGCTCCGCTGAG | 0.2   | 4MMs [8:9:11:20]  | Intergenic | chrX:38,991,559-38,991,581    |
| GCCAGGGATTGGCCTCCGCGTAG | 0.2   | 4MMs [3:7:11:13]  | Exonic     | chr7:97,580,195-97,580,217    |
| GGGAGGTAGTGGGCTCCGTGTGG | 0.2   | 4MMs [2:9:11:19]  | Intronic   | chr11:109,664,427-109,664,449 |
| AGGAGGTATTCGCCTTCGCGGAG | 0.1   | 4MMs [1:2:13:16]  | Exonic     | chr9:72,891,855-72,891,877    |
| GCGAGGTCTTCGGCGCGGCGAGG | 0.1   | 4MMs [8:9:15:17]  | Intergenic | chr5:35,399,703-35,399,722    |
| GCTAGGTCTTCGGGTCTGCGAAG | 0.1   | 4MMs [3:8:14:17]  | Intergenic | chr10:117,568,810-117,568,832 |
| GCAAGGTCTTCGGCTACCCGAAG | 0.1   | 4MMs [3:8:16:18]  | Exonic     | chr7:5,030,840-5,030,862      |
| GCGAGGTACGCGGTTCCGCTGAG | 0.1   | 4MMs [9:10:14:20] | Intronic   | chr1:77,513,423-77,513,445    |
| GCGAGGGATTGGGCTCCCCTTAG | 0.0   | 4MMs [7:11:18:20] | Intronic   | chr7:45,529,474-45,529,496    |
| GCGAGGTACTTGGCTGTGCGCAG | 0.0   | 4MMs [9:11:16:17] | Intronic   | chr6:33,395,524-33,395,543    |
| GCGAGGTATTCGCTTACGCGTAG | 0.0   | 3MMs [13:14:16]   | Intronic   | chr19:8,741,684-8,741,706     |
| GCCAGGTATTCGTTATGCGAGG  | 0.0   | 4MMs [3:14:16:17] | Intergenic | chr1:30,181,618-30,181,640    |

Supplementary Table 6. Non-targeting sgRNA protospacer predicted binding sites throughout *Mus musculus* genome.

There are no high-affinity binding sites for our NT-sgRNA across the entire mouse genome. All of the 15 total low-probability sites and “scores” are presented above. “Score” ranges from 0-100 and denotes the predicted on-target faithfulness of our synthesized sgRNA acting at the mismatched locus.
